# Supplementary material for: Preparation of nitrogen-doped carbon quantum dots and its application as a fluorescent probe for Cr(vi) ion detection
Source: Royal Society of Chemistry journal article supplement (doi:10.1039/c8nj06305b), 2019-01-01
Supplement: c8nj06305b1.pdf [file c8nj06305b1.pdf]

## **Preparation of nitrogen-doped carbon quantum dots and its application as fluorescent probe for Cr(VI) detection**

**Xiaomin Luo<sup>a\*</sup> Pengxia Bai<sup>b</sup> Xuechuan Wang<sup>a,b\*</sup> Guohui Zhao<sup>c</sup> Jianyan Feng<sup>a</sup> Huijun Ren<sup>d</sup>**

<sup>a</sup>(College of Bioresources Chemical and Materials Engineering, National Demonstration Center for Experimental Light Chemistry Engineering Education, Shaanxi University of Science & Technology, Xi'an 710021, China;

<sup>b</sup>College of Chemistry and Chemical Engineering, Shaanxi University of Science & Technology, Xi'an 710021, China;

<sup>c</sup>Jiaxing City Fur and Footwear Industry Research Institute, Zhejiang Tongxiang, 314500, China;

<sup>d</sup>School of Arts and Sciences, Shaanxi University of Science & Technology, Xi'an 710021, China)

\*Corresponding authors: luoxiaominsust@163.com (Xm. Luo); Tel: +86 158 0928 2916;  
wangxc@sust.edu.cn (Xc. Wang); Tel: +86 029 8616 8008.

### **Optimization of preparation conditions for N-CQDs**

The results showed that the fluorescence intensity of N-CQDs was affected by reaction time, reaction temperature and gelatin dosage. Therefore, the optimum preparation conditions of N-CQDs were determined by single factor optimization experiments and orthogonal experiments.

#### **Single factor experiment**

Single factor optimization experiments were carried out as follows: Firstly, according to the preparation method of N-CQDs, the time is set to 2 h, 4 h, 6 h, 8 h and 10 h to optimize the time, separately. Secondly, on the basis of the preparation method of N-CQDs, the temperature heated at 140 °C, 160 °C, 180 °C, 200 °C, 220 °C to select the optimum temperature for preparing N-CQDs, respectively. Thirdly, based on the preparation method of N-CQDs, the optimum gelatin dosage for N-CQDs was obtained by changing the amount of gelatin to 3 g, 4 g, 5 g, 6 g and 7 g, respectively. The experimental results are shown in Fig. S1, Fig. S2 and Fig. S3, respectively.

#### **Orthogonal experiment**

The time, temperature and gelatin dosage as the influencing factors, a three-factor and three-level experiment was designed according to the single factor optimization result, as shown in Table S1. The orthogonal table  $L_9 (3^3)$  was selected for experimentation without considering the interaction of various factors. The orthogonal experimental table is shown in Table S2. Orthogonal experimental results are shown in Table S3.

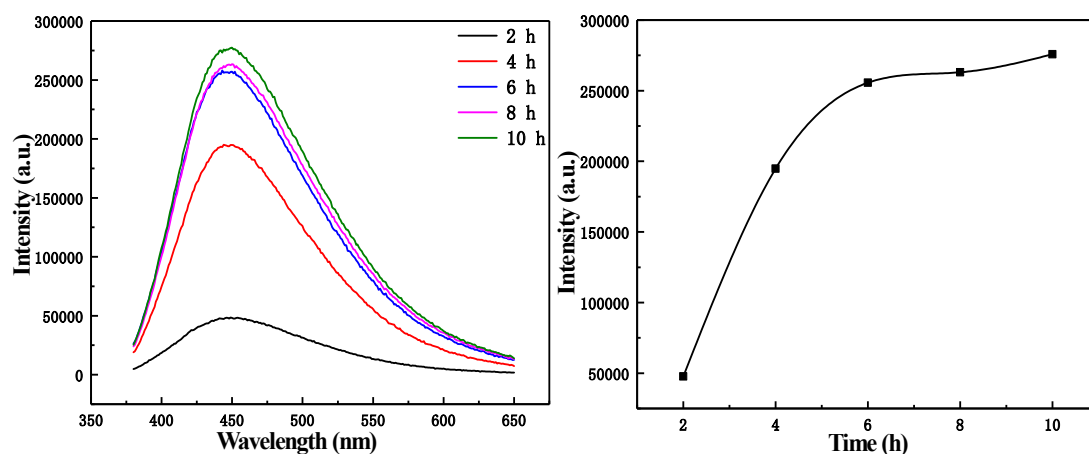

**Fig. S1** Fluorescence spectra of N-CQDs at different time

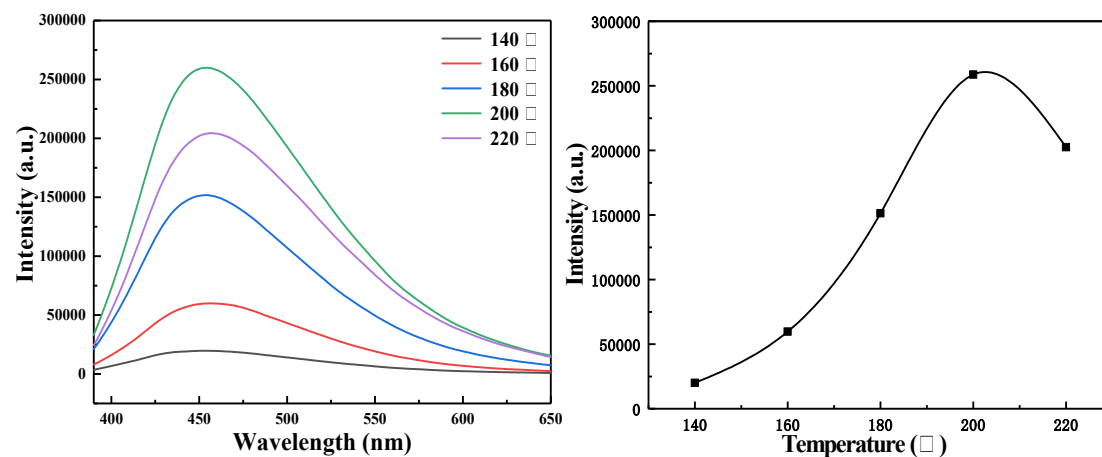

**Fig. S2** Fluorescence spectra of N-CQDs at different temperatures

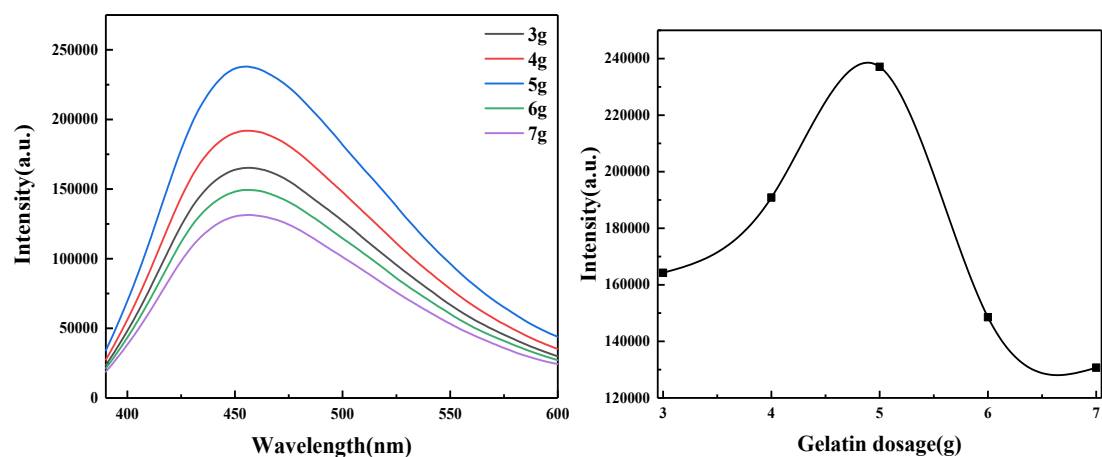

**Fig. S3** Fluorescence spectra of N-CQDs at different gelatin dosage

**Tab. S1** The factors and levels of orthogonal experiment

| Level | (A) Time/ h | (B) Temperature/ °C | (C) gelatin dosage/ g |
|-------|-------------|---------------------|-----------------------|
| 1     | 4           | 180                 | 4                     |
| 2     | 6           | 200                 | 5                     |
| 3     | 8           | 220                 | 6                     |

**Tab. S2** The orthogonal experiment scheme

| Experiment number | A | B | C | Experimental program                         |
|-------------------|---|---|---|----------------------------------------------|
| 1                 | 1 | 1 | 1 | A <sub>1</sub> B <sub>1</sub> C <sub>1</sub> |
| 2                 | 1 | 2 | 2 | A <sub>1</sub> B <sub>2</sub> C <sub>2</sub> |
| 3                 | 1 | 3 | 3 | A <sub>1</sub> B <sub>3</sub> C <sub>3</sub> |
| 4                 | 2 | 1 | 2 | A <sub>2</sub> B <sub>1</sub> C <sub>2</sub> |
| 5                 | 2 | 2 | 3 | A <sub>2</sub> B <sub>2</sub> C <sub>3</sub> |
| 6                 | 2 | 3 | 1 | A <sub>2</sub> B <sub>3</sub> C <sub>1</sub> |
| 7                 | 3 | 1 | 3 | A <sub>3</sub> B <sub>1</sub> C <sub>3</sub> |
| 8                 | 3 | 2 | 1 | A <sub>3</sub> B <sub>2</sub> C <sub>1</sub> |
| 9                 | 3 | 3 | 2 | A <sub>3</sub> B <sub>3</sub> C <sub>2</sub> |

**Tab. S3** The numerical of orthogonal tests

| Experiment number              | A              | B                                            | C              | Intensity  |
|--------------------------------|----------------|----------------------------------------------|----------------|------------|
| 1                              | 1              | 1                                            | 1              | 32114.9648 |
| 2                              | 1              | 2                                            | 2              | 37695.4023 |
| 3                              | 1              | 3                                            | 3              | 27217.3379 |
| 4                              | 2              | 1                                            | 2              | 61379.043  |
| 5                              | 2              | 2                                            | 3              | 98131.2656 |
| 6                              | 2              | 3                                            | 1              | 78702.1563 |
| 7                              | 3              | 1                                            | 3              | 41187.8281 |
| 8                              | 3              | 2                                            | 1              | 46402.5508 |
| 9                              | 3              | 3                                            | 2              | 54434.8359 |
| K <sub>1</sub>                 | 97027.705      | 134681.8359                                  | 157219.6719    |            |
| K <sub>2</sub>                 | 238212.4649    | 182229.2187                                  | 153509.2812    |            |
| K <sub>3</sub>                 | 142025.2148    | 160354.3301                                  | 166536.4316    |            |
| k <sub>1</sub>                 | 32342.56833    | 44893.9453                                   | 52406.5573     |            |
| k <sub>2</sub>                 | 79404.15497    | 60743.0729                                   | 51169.7604     |            |
| k <sub>3</sub>                 | 47341.73827    | 53451.44337                                  | 55512.14387    |            |
| R                              | 47061.58614    | 15849.1276                                   | 3105.58657     |            |
| Primary and<br>secondary order |                | A>B>C                                        |                |            |
| Excellent level                | A <sub>2</sub> | B <sub>2</sub>                               | C <sub>3</sub> |            |
| Excellent<br>combination       |                | A <sub>2</sub> B <sub>2</sub> C <sub>3</sub> |                |            |

As can be seen from Table S3, the order of factors affecting fluorescence intensity is  $A > B > C$ , and the best scheme is  $A_2B_2C_3$ . According to the above results, the optimum conditions for preparing N-CQDs are hydrothermal time of 6 h, temperature of 200 °C and gelatin dosage of 6 g.
